# Supplementary material for: Multicenter development and validation of a predictive model for macrolide treatment nonresponse in school-aged children with Mycoplasma pneumoniae pneumonia
Source: Research Square preprint supplement (doi:10.21203/rs.3.rs-8088705/v1), 2025-12-17
Supplement: Supplementary file 1 [file a4a3ffd05e82aecba2ac89cd.docx]

**Supplementary Material**

**Table 1 Baseline characteristics grouped by derivation cohort and validation cohort.**

| **Variables** | **Total (N=323)** | **Train Cohort**  **(N=226)** | **Validation Cohort (N=97)** | ***P value*** |
| --- | --- | --- | --- | --- |
| Treatment response,n(%) |  |  |  | 0.894 |
| MRMMP group | 193 (59.8) | 134 (59.3) | 59 (60.8) |  |
| MUMPP group | 130 (40.2) | 92 (40.7) | 38 (39.2) |  |
| **General information** |  |  |  |  |
| Sex, n(%) |  |  |  | 0.856 |
| Male | 179 (55.42) | 124 (54.87) | 55 (56.70) |  |
| Female | 144 (44.58) | 102 (45.13) | 42 (43.30) |  |
| Age, years | 7.38±1.57 | 7.44±1.61 | 7.25±1.47 | 0.286 |
| BMI, n(%)a |  |  |  | 0.395 |
| Normal | 241(74.61) | 170(75.22) | 69(74.14) |  |
| underweight | 34(10.53) | 21(9.29) | 14(14.43) |  |
| Overweight or Obesity | 48(14.86) | 35(15.49) | 14(14.43) |  |
| Race, n(%) |  |  |  | 0.790 |
| Han Chinese | 296 (91.6%) | 206 (91.2%) | 90 (92.8%) |  |
| Other ethnic groups | 27 (8.36%) | 20 (8.85%) | 7 (7.22%) |  |
| **Pre-admission treatment and clinical characteristics** |  |  |  |  |
| Receipt of penicillin, n (%) | 71(21.98) | 49(21.68) | 22(22.68) | 0.842 |
| Receipt of cephalosporins,n (%) | 210(65.02) | 144(63.72) | 66(68.04) | 0.455 |
| Receipt of antiviral drugs,n (%) | 218(67.49) | 154(68.14) | 64(65.98) | 0.704 |
| Receipt of nebulization,n (%) | 148(45.82) | 104(46.02) | 44(45.36) | 0.914 |
| Duration of cough, days | 5.98±2.36 | 5.93±2.36 | 6.08±2.37 | 0.605 |
| Duration of fever, days | 3.59±1.43 | 3.56±1.41 | 3.66±1.49 | 0.583 |
| **Laboratory tests** |  |  |  |  |
| WBC, 109/L | 7.81±2.47 | 7.73±2.41 | 7.98±2.62 | 0.421 |
| NUE#, 109/L | 4.61±2.17 | 4.70±2.20 | 4.39±2.10 | 0.224 |
| LYM#, 109/L | 2.64±1.42 | 2.60±1.50 | 2.63±1.23 | 0.874 |
| PLT, 109/L | 284±79.0 | 289±77.8 | 276±82.6 | 0.168 |
| EOS#, 109/L | 0.09 [0.03;0.16] | 0.10 [0.03;0.15] | 0.08 [0.03;0.22] | 0.523 |
| CRP, mg/L | 6.86±3.72 | 7.05±3.77 | 6.41±3.58 | 0.149 |
| PCT, ng/ml | 0.22 [0.13;0.30] | 0.23 [0.12;0.32] | 0.19 [0.14;0.29] | 0.414 |
| ALB, g/L | 43.6±2.97 | 43.4±2.94 | 43.9±3.04 | 0.286 |
| CK, U/L | 80.4±16.1 | 78.3±15.8 | 80.9±16.8 | 0.699 |
| CK-MB, U/L | 20.8±5.45 | 20.5±5.58 | 21.4±5.13 | 0.181 |
| D-dimer, mg/L | 0.49 [0.36;0.69] | 0.48 [0.35;0.66] | 0.51 [0.37;0.99] | 0.266 |
| LI-6, pg/ml | 11.4±5.24 | 11.6±5.43 | 11.1±4.76 | 0.450 |
| LDH, U/L | 292±48.9 | 294±48.4 | 289±49.9 | 0.479 |
| **CT score** |  |  |  |  |
| Total score | 7.00 [6.00;9.00] | 7.00 [6.00;8.00] | 7.00 [6.00;9.00] | 0.402 |
| Right upper lobe | 0.00 [0.00;3.00] | 0.00 [0.00;3.00] | 0.00 [0.00;3.00] | 0.561 |
| Right middle lobe | 2.00 [0.00;4.00] | 2.50 [0.00;4.00] | 2.00 [0.00;4.00] | 0.480 |
| Right lower lobe | 3.00 [0.00;4.00] | 3.00 [0.00;4.00] | 4.00 [0.00;4.00] | 0.168 |
| Left Upper lobe | 0.00 [0.00;0.00] | 0.00 [0.00;0.00] | 0.00 [0.00;0.00] | 0.693 |
| Left lower lobe | 0.00 [0.00;0.50] | 0.00 [0.00;0.00] | 0.00 [0.00;1.00] | 0.773 |

a Classification based on body mass index for Asian populations

**Table 2 The results of Delong test for AUC values of variables in the training cohort.**

| **Compares** | **AUC (95% CI) 1** | **AUC (95% CI) 2** | **Diff** | ***p*** |
| --- | --- | --- | --- | --- |
| Duration of fever vs LDH | 0.715 (0.65-0.78) | 0.751(0.681-0.821) | -0.036 | 0.453 |
| Duration of fever vs CT score | 0.715 (0.65-0.78) | 0.618(0.54-0.695) | 0.097 | 0.06 |
| Duration of fever vs Model | 0.715 (0.65-0.78) | 0.834(0.779-0.89) | -0.119 | <0.001 |
| LDH vs CT score | 0.751(0.681-0.821) | 0.618(0.54-0.695) | 0.133 | 0.025 |
| LDH vs Model | 0.751(0.681-0.821) | 0.834(0.779-0.89) | -0.083 | <0.001 |
| CT score vs Model | 0.618(0.54-0.695) | 0.834(0.779-0.89) | -0.216 | <0.001 |

**Table 3 The results of Delong test for AUC values of variables in the validation cohort.**

| **Compares** | **AUC (95% CI) 1** | **AUC (95% CI) 2** | **Diff** | ***p*** |
| --- | --- | --- | --- | --- |
| Duration of fever vs LDH | 0.733 (0.633-0.834) | 0.798(0.707-0.889) | -0.065 | 0.344 |
| Duration of fever vs CT score | 0.733 (0.633-0.834) | 0.629(0.513-0.746) | 0.104 | 0.204 |
| Duration of fever vs Model | 0.733 (0.633-0.834) | 0.86(0.784-0.936) | -0.127 | 0.014 |
| LDH vs CT score | 0.798(0.707-0.889) | 0.629(0.513-0.746) | 0.169 | 0.026 |
| LDH vs Model | 0.798(0.707-0.889) | 0.86(0.784-0.936) | 0.062 | 0.044 |
| CT score vs Model | 0.629(0.513-0.746) | 0.86(0.784-0.936) | -0.231 | <0.001 |
